# Supplementary material
Source: HighWire-hosted journal article supplement (https://www.cmajopen.ca/highwire/filestream/80874/field_highwire_adjunct_files/1/open-2015-0138-original-submission.pdf)
Supplement: open-2015-0138-original-submission.pdf [file open-2015-0138-original-submission.pdf]

1  
2  
3  
4  
5  
6  
7  
8  
9  
10  
11  
12  
13  
14  
15  
16  
17  
18  
19  
20  
21  
22  
23  
24  
25  
26  
27  
28  
29  
30  
31  
32  
33  
34  
35  
36  
37  
38  
39  
40  
41  
42  
43  
44  
45  
46  
47  
48  
49  
50  
51  
52  
53  
54  
55  
56  
57  
58  
59  
60

1 **Relationship between Initial Treatment Strategy in Stable Coronary Artery Disease**  
2 **and 1-Year Costs**

3  
4 Short title: Stable angina and 1 year costs

5  
6 Jaskaran S Kang MD<sup>1</sup>, Maria C Bennell MSc MPH<sup>1</sup>, Feng Qiu MSc<sup>2</sup>, Merrill L  
7 Knudtson MD<sup>3</sup>, Peter C Austin PhD<sup>2,4</sup>, Dennis T Ko MD MSc<sup>1,2,4</sup>, Harindra C  
8 Wijeyesundera MD PhD<sup>1,2,4</sup>

9  
10 **Affiliations:** <sup>1</sup>Schulich Heart Centre, Division of Cardiology, Sunnybrook Health  
11 Sciences Centre, University of Toronto, Ontario, Canada; <sup>2</sup>Institute for Clinical  
12 Evaluative Sciences (ICES), Ontario, Canada; <sup>3</sup>Libin Cardiovascular Institute,  
13 University of Calgary, Calgary, Alberta; <sup>4</sup>Institute of Health Policy, Management and  
14 Evaluation, University of Toronto, Ontario, Canada.

15  
16 **Address for Correspondence:**

17 Harindra C Wijeyesundera  
18 2075 Bayview Avenue, Suite A202  
19 Toronto, Ontario M4N3M5  
20 Tel: (416)480-4527 Fax: (416)480-4657  
21 Email: [harindra.wijeyesundera@sunnybrook.ca](mailto:harindra.wijeyesundera@sunnybrook.ca)

22 Word count: 2,266  
23  
24

1  
2  
3 25 **ABSTRACT**

4  
5 26 **Background:**

6  
7  
8 27 Cardiovascular disease is one of the most costly chronic diseases, with annual  
9  
10 28 expenditures projected to continue to increase. The relationship between initial treatment  
11  
12 29 strategy and cumulative costs is unknown. Our objective was to examine the variation in  
13  
14 30 patient-level costs and identify drivers of cost in patients with stable coronary artery  
15  
16 31 disease (CAD).

17  
18  
19  
20 32 **Methods:**

21  
22 33 In this retrospective cohort study using administrative databases in Ontario, Canada, we  
23  
24 34 identified all patients with stable coronary artery disease identified after index  
25  
26 35 angiography. We categorized hospitals into low, medium or high revascularization ratio  
27  
28 36 centers. The primary outcome was the cumulative 1-year health care costs. We used a  
29  
30 37 hierarchical generalized linear model to identify patient and hospital characteristics  
31  
32 38 associated with patient costs. Our model included two main co-variates of interest: (1) the  
33  
34 39 treatment allocation (medical vs. PCI vs. CABG) and (2) the hospital revascularization  
35  
36 40 ratio. The model was adjusted for patient, physician and hospital factors.

37  
38  
39  
40  
41 41 **Results:**

42  
43 42 Our cohort consisted of 39,126 patients (15,138 medical therapy, 23,988 revascularized).  
44  
45 43 The mean 1-year cost was \$24,026 (range: \$54 to \$985,600). The mean cost for medical  
46  
47 44 management versus revascularization was \$18,069 and \$27,786 respectively. The  
48  
49 45 strongest predictor of 1-year costs was revascularization (PCI: RR 1.27, 95% CI 1.24-  
50  
51 46 1.31; CABG: RR 2.62, 95% CI 2.53-2.71). Hospital revascularization ratio did not  
52  
53  
54  
55  
56  
57  
58  
59  
60

1  
2  
3 47 significant impact costs, and there was no significant interaction between treatment and  
4  
5  
6 48 revascularization ratio.

7  
8 **49 Conclusions:**

9  
10 50 Revascularization is a major predictor of 1-year cumulative health care costs,  
11  
12 51 highlighting the resource utilization impact of decisions regarding initial treatment  
13  
14  
15 52 strategy.

16  
17 53 **Key Words:** Cardiac disease – coronary, Health economics

18  
19  
20 54

21  
22  
23  
24  
25  
26  
27  
28  
29  
30  
31  
32  
33  
34  
35  
36  
37  
38  
39  
40  
41  
42  
43  
44  
45  
46  
47  
48  
49  
50  
51  
52  
53  
54  
55  
56  
57  
58  
59  
60

Confidential

## 55 **Introduction**

56 Coronary artery disease (CAD) is a leading cause of morbidity and mortality,[1]  
57 and as such represents a major economic burden on healthcare expenditures.[2] In 2005,  
58 it was estimated that the cost of cardiovascular disease was \$20.9 billion in the United  
59 States, with annual expenditures projected to triple by 2030.[1-3]

60 The treatment for stable CAD includes medical therapy alone or in combination  
61 with revascularization by either percutaneous coronary intervention (PCI) or coronary  
62 artery bypass grafting (CABG). There is ongoing controversy as to the best initial  
63 treatment strategy despite numerous landmark trials, suggesting that the two treatment  
64 choices are equivalent in regards to death and major adverse cardiovascular events as  
65 well as symptom relief.[4-6] This debate has resulted in significant variation in clinical  
66 practice.[7] Understanding the potential impact of such practice variation on resource  
67 utilization is important. This is especially relevant given the current era of substantial  
68 budgetary constraints, where there is high priority for the efficient use of scarce health  
69 care resources. Indeed, recent guidelines from professional cardiovascular societies  
70 reinforce the importance of incorporating value and resource implications into health care  
71 decisions.[8]

72 Although there are studies examining the predictors of initial treatment strategy in  
73 patients with stable CAD, there is a paucity of literature on the impact of the different  
74 treatment strategies on health care costs. Accordingly, we sought to address this gap in  
75 knowledge by studying the cumulative 1-year health care costs in patients diagnosed with  
76 stable CAD after a coronary angiogram, using a population-based clinical registry of  
77 patients in Ontario, Canada. Ontario is Canada's largest province with approximately 14

1  
2  
3 78 million residents, all of whom receive universal health coverage, provided by a single 3<sup>rd</sup>  
4  
5 79 party payer, the Ministry of Health and Long Term Care (MOHTLC). Our objectives  
6  
7  
8 80 were to determine the degree of variation in health care costs, and understand the  
9  
10 81 predictors of cumulative healthcare costs. In particular, we were interested in the  
11  
12 82 relationship between initial treatment strategy (medical management versus  
13  
14 83 revascularization) as well as the impact of hospital revascularization ratio on subsequent  
15  
16 84 health care utilization.  
17  
18  
19  
20  
21

## 22 86 **Methods**

23  
24  
25 87 This study was approved by the institutional review board at Sunnybrook Health  
26  
27 88 Sciences Centre, Toronto, Canada. Under Ontario's Personal Health Information  
28  
29 89 Protection Act (PHIPA), the need for patient consent was waived.  
30  
31

### 32 90 *Study Type*

33  
34 91 Observational cohort study  
35

### 36 92 *Setting*

37  
38  
39 93 Our primary data source was the Cardiac Care Network (CCN) of Ontario.  
40  
41 94 CCN is comprised of 19 member hospitals that provide adult cardiac services, and  
42  
43 95 includes a clinical registry of patients who undergo cardiac angiography, PCI, or  
44  
45 96 CABG.[9,10] Its accuracy has been validated by retrospective chart review.[11,12] We  
46  
47 97 linked CCN data to population-level administrative databases using unique, encoded  
48  
49 98 identifiers and analyzed it at the Institute for Clinical Evaluative Sciences (ICES).[13-  
50  
51 99 16]  
52  
53  
54

55 100 We used several administrative databases in our study. The Canadian Institute  
56  
57  
58  
59  
60

1  
2  
3 101 for Health Information Discharge Abstract Database (CIHI-DAD) contains data on all  
4  
5 102 hospitalizations. The CIHI-DAD includes a “most responsible” diagnosis and up to 24  
6  
7  
8 103 additional diagnoses codes that can be used to estimate comorbidity. We used the  
9  
10 104 Ontario Registered Persons Database to ascertain death. We obtained data on  
11  
12 105 physician visits/consultation from the fee-for-service claims history in the Ontario  
13  
14 106 Health Insurance Program (OHIP) database, and the National Ambulatory Care  
15  
16 107 Reporting Service database for administrative, clinical, financial, and demographic  
17  
18 108 data for hospital-based ambulatory care, including emergency department visits,  
19  
20 109 outpatient surgical procedures, medical day/night care, and high-cost ambulatory  
21  
22 110 clinics such as dialysis, cardiac catheterization, and oncology. We obtained medication  
23  
24 111 information from the Ontario Drug Database, which has comprehensive drug  
25  
26 112 utilization information on patients over 65 years of age, for whom full drug coverage  
27  
28 113 is provided for by the Ontario Ministry of Health and Long Term Care of Ontario  
29  
30 114 (MOHLTC).

31  
32  
33  
34  
35  
36 115 *Patients*

37  
38  
39 116 The cohort consisted of patients who received an angiogram between October  
40  
41 117 1<sup>st</sup> 2008 and September 30<sup>th</sup> 2011, for the indication of stable CAD, and had obstructive  
42  
43 118 coronary stenosis. During this period, there were only 18 CCN member hospitals. For  
44  
45 119 patients who received multiple angiograms during the study period, we considered only  
46  
47 120 the initial angiogram. Refer to Figure 1 for additional inclusion and exclusion criteria.  
48  
49 121 We allocated patients revascularized within 90 days of their index angiogram to the  
50  
51 122 revascularization strategy (and into PCI or CABG subgroups), as is consistent with the  
52  
53 123 literature and known procedural wait-times,[10,11] and all remaining patients to the  
54  
55  
56  
57  
58  
59  
60

1  
2  
3 124 medical therapy strategy. We categorized patients that received multiple angiograms  
4  
5 125 within this timeframe on the basis of the first procedure they received.  
6  
7

### 8 126 *Revascularization to Medical Therapy Ratio*

9  
10 127 We calculated revascularization to medical therapy ratio (referred to herein as  
11  
12 128 revascularization ratio), defined as the number of patients who were categorized as  
13  
14 129 revascularization patients divided by the number of patients who underwent medical  
15  
16 130 therapy. We then allocated the hospitals into one of three categories, high, medium, or  
17  
18 131 low, based on equal tertiles of revascularization ratio.  
19  
20

### 21 132 *Main Outcomes*

22  
23  
24 133 The primary outcome was the total cumulative cost per patient in the one year  
25  
26 134 following the index angiogram. Complete cost profiles were available for all patients for  
27  
28 135 1 year or until death. As such, we did not have to consider censored costs in our  
29  
30 136 analyses. The categories of costs were all-cause physician visits and laboratory tests,  
31  
32 137 acute care and chronic care hospitalizations, emergency department visits, same day  
33  
34 138 surgeries, and CAD-related medication use for patients  $\geq 65$  years of age.[15,16]  
35  
36  
37

38  
39 139 We determined costs associated with physician visits and laboratory tests using  
40  
41 140 data from the claims history of the OHIP database.[14] The OHIP database also  
42  
43 141 included shadow billings from providers of organizations covered by alternate payment  
44  
45 142 arrangements. We estimated the cost of hospitalization using the Resource Intensity  
46  
47 143 Weight (RIW) methodology.[16] We multiplied the RIW associated with the case-mix  
48  
49 144 group for each hospitalization in the CIHI-DAD by the average provincial cost per  
50  
51 145 weighted case for all Ontario acute and chronic care hospitals for that year.[16] This  
52  
53 146 method yields a mean cost per hospitalization for cases assigned to a particular case-  
54  
55  
56  
57  
58  
59  
60

1  
2  
3 147 mix group category. We used a similar RIW methodology to determine the costs for  
4  
5 148 emergency department visits and same day surgeries, both using the National  
6  
7  
8 149 Ambulatory Care Reporting Service database. We adjusted costs to 2013 Canadian  
9  
10 150 dollars using the Consumer Price Index.

### 11 12 13 151 *Statistical Analyses*

14  
15 152 We used hierarchical generalized linear models, with a logarithmic link and  
16  
17 153 gamma distribution. The models incorporated hospital-specific random effects to account  
18  
19 154 for within-hospital homogeneity in outcomes. The logarithmic link function is  
20  
21 155 advantageous, as it restricts predicted costs to positive values. In addition, final model  
22  
23 156 coefficients are straightforward to interpret; specifically, the exponential of the  
24  
25 157 coefficient provides a rate ratio (RR), or the relative increase in the mean cost for a one  
26  
27 158 unit change in the predictor variable. We used the gamma distribution because of the  
28  
29 159 skewed distribution of health care costs.[17] Our models included 2 main co-variables of  
30  
31 160 interest: 1) the treatment allocation (medical vs PCI vs CABG) and 2) the  
32  
33 161 revascularization ratio (high vs medium vs low). In addition, the models included an  
34  
35 162 interaction between treatment allocation and revascularization ratio. We adjusted the  
36  
37 163 models for patient, physician and hospital factors, as listed in Table 1. We fit the  
38  
39 164 hierarchical generalized linear models using Proc GLIMMIX using SAS Version 9.3  
40  
41 165 (SAS Institute Inc., Cary, NC).

42  
43  
44  
45  
46  
47  
48 166

## 49 167 **Results**

### 50 51 168 *Patients*



1  
2  
3 169 Between October 1<sup>st</sup>, 2008 and September 30<sup>th</sup>, 2012, a total of 183,630  
4  
5 170 angiograms were performed in Ontario. The final cohort was compromised of 39,126  
6  
7 171 stable CAD patients, of which 15,138 were medically treated and 23,988 were treated  
8  
9 172 with revascularization (PCI: 15,601 patients, CABG: 8,387 patients; Figure 1). There  
10  
11 173 were substantial differences in the baseline characteristics between medical therapy and  
12  
13 174 revascularized groups (Table 1), with medically treated patients being older, more likely  
14  
15 175 to be female, having greater co-morbidity and less severe anginal symptoms based on  
16  
17 176 Canadian Cardiovascular Society (CCS) class.  
18  
19

### 20 177 *Revascularization Ratio*

21  
22 178 The average revascularization ratio across the 18 Ontario hospitals was 1.58,  
23  
24 179 ranging from 1.09 to 2.31 (Appendix Figure 1).  
25  
26

### 27 180 *Variation in Cumulative 1-Year Health Care Cost*

28  
29 181 Individual patient 1-year cost varied substantially, from a minimum of \$54 to a  
30  
31 182 maximum of \$985,600. As seen in Figure 2, the overall cost was heavily skewed, with an  
32  
33 183 overall median of \$15,707 and overall mean of \$24,026. The mean (and median) costs for  
34  
35 184 medical and revascularization treatments were \$18,069 (\$7,867) and \$27,786 (\$21,428)  
36  
37 185 respectively. The mean cost by hospital ranged from \$19,749 to \$28,473.  
38  
39

### 40 186 *Components of Health Care Costs*

41  
42 187 The majority of healthcare costs were due to acute care hospitalization with a  
43  
44 188 significantly higher cost for patients undergoing revascularization than patients managed  
45  
46 189 with medical therapy (Table 2). This was primarily driven by the cost of CABG.  
47  
48

### 49 190 *Predictors of Health Care Costs*

1  
2  
3 191 The results of the fully adjusted model are found in Table 3. In so far as our 2  
4  
5 192 primary co-variables of interest, there was no significant difference in cost associated with  
6  
7  
8 193 the hospital tertile revascularization ratio. In contrast, revascularization was a significant  
9  
10 194 predictor of mean cost regardless of the modality (PCI: RR 1.27, 95% CI 1.24-1.31;  
11  
12 195 CABG: RR 2.62, 95% CI 2.53-2.71;  $P<0.001$  for both).

15 196 In addition, sex was a statistically significant predictor of mean cost, with a RR of  
16  
17 197 0.96 (95% CI 0.95-0.98) for males ( $P<0.001$ ), indicating that the mean per-patient cost  
18  
19 198 was 4% less for males compared to females (Table 3). Peripheral vascular disease (RR  
20  
21 199 1.25, 95% CI 1.21-1.28,  $P<0.001$ ), hypertension (RR 1.11, 95% CI 1.08-1.13,  $P<0.001$ ),  
22  
23 200 and higher Charlson score (RR 1.17, 95% CI 1.16-1.17,  $P<0.001$ ) were associated with  
24  
25 201 higher mean cost. Previous cardiac surgery was associated with a 17% reduction in mean  
26  
27 202 cost. Symptom severity, as measured by CCS class, had an impact on mean cost, with  
28  
29 203 more symptomatic patients, in general, having lower mean cost. The specialty of the  
30  
31 204 referral physician was a predictor of cost, with patients who were referred by either  
32  
33 205 cardiologists or other physicians having an increased 1-year cumulative cost compared to  
34  
35 206 those referred by their family physicians. In general, busier hospitals (as measured by  
36  
37 207 their annual cardiac catheterization volume) had lower cost, although the magnitude of  
38  
39 208 this effect was small.

45 209 In our interaction model (see Appendix Table 1), we were able to compare the  
46  
47 210 cost of each initial strategy, stratified by the type of hospital (low, medium or high  
48  
49 211 revascularization ratio). We found that, on average, there was no difference in cumulative  
50  
51 212 1-year health care cost for patients treated medically compared to those undergoing  
52  
53 213 revascularization at the different strata defined by the hospital revascularization ratio.  
54  
55  
56  
57  
58  
59  
60

1  
2  
3 214 Similarly, patients treated initially by PCI had similar costs at high vs medium vs low  
4  
5 215 revascularization hospitals, as did CABG patients.  
6  
7

8 216

9  
10 217 **Interpretation**

11  
12 218 In this study we found significant variation in the 1-year cumulative health care  
13  
14 219 costs among stable CAD patients treated at different hospitals. Patients with greater co-  
15  
16 220 morbidity had higher cost, as did patients treated with either type of revascularization.  
17

18  
19 221 Our analysis suggests that the majority of the variation in cost was attributable to the  
20  
21 222 differences in treatment strategy. Importantly, the variation observed between-hospitals  
22  
23 223 based on revascularization ratio was not associated with a statistically significant  
24  
25 224 difference in cumulative health care costs, regardless of the management strategy.  
26  
27

28  
29 225 To the best of our knowledge, ours is the first study to evaluate cumulative health  
30  
31 226 care costs associated with differing initial treatment strategies among stable CAD patients  
32  
33 227 in over a decade and the first to look at the drivers of these costs. It has previously been  
34  
35 228 reported that the direct cost of stable CAD accounted for 1.3 % of the UK national health  
36  
37 229 expenditures.[18] The vast majority of this cost was related to revascularization  
38  
39 230 procedures (35% of cost) and hospital bed occupancy (31% of cost). Additionally, drug  
40  
41 231 treatment accounted for 12% of total expenditures. Similar findings were found in several  
42  
43 232 other UK and European studies.[19,20]  
44  
45

46  
47 233 In our study, the major driver for 1-year cumulative costs was the receipt of  
48  
49 234 revascularization. If revascularization offers no impact on mortality and if symptom relief  
50  
51 235 is equivocal, as previous RCTs have shown, then our study suggests that the decision to  
52  
53 236 pursue a revascularization strategy will translate into a substantial impact on healthcare  
54  
55  
56  
57  
58  
59  
60

1  
2  
3 237 resources. It follows that revascularization in patients with minimal symptoms in whom  
4  
5 238 clinical benefit may be marginal may concurrently place an important financial burden on  
6  
7  
8 239 the healthcare system. This reinforces the importance of appropriate selection of patients  
9  
10 240 who should receive PCI or CABG. Interestingly, the cumulative cost for each of the  
11  
12 241 treatment strategies did not vary with hospital revascularization ratio – i.e. the cost of a  
13  
14 242 strategy was similar regardless of the sites tendencies to favor revascularization or  
15  
16  
17 243 medical management. This implies a similar degree of efficiency for hospitals at different  
18  
19 244 revascularization strata, which is a reassuring finding.

20  
21  
22 245 Our findings should be interpreted in the context of several limitations that merit  
23  
24 246 discussion. First, we were limited to administrative databases, and thus do not have  
25  
26  
27 247 information on several important factors, such as intensity of medical optimization that  
28  
29 248 may influence cost. Second, we were unable to calculate the indirect costs, such as  
30  
31 249 productivity losses, which has been reported to account upwards to 75% of the total cost  
32  
33 250 of CAD.[19] Third, based on our allocation of treatment strategy, there is a risk of  
34  
35  
36 251 survivorship bias, in that patients who died within 90 days were allocated to the medical  
37  
38 252 therapy group and thus have lower costs. This risk is mitigated by the fact that our cohort  
39  
40 253 was a stable CAD population with very low mortality – indeed, our previous work  
41  
42 254 showed a 90 day mortality that was <1%.[21] Finally, we limited our analyses to health  
43  
44 255 care costs over a restricted 1 year time-horizon in a cohort of patients post coronary  
45  
46  
47 256 angiography. As such, our results cannot be generalized to stable CAD patients who have  
48  
49 257 not undergone angiography.  
50  
51  
52  
53  
54  
55  
56  
57  
58  
59  
60

1  
2  
3 258 In conclusion, the majority of costs associated with stable CAD are due to acute  
4  
5 259 care hospitalization, with the primary driver being revascularization. Our study highlights  
6  
7  
8 260 the resource implications of an initial revascularization strategy.  
9

10 261

## 11 262 **ACKNOWLEDGMENTS**

12  
13  
14  
15 263 None  
16

17 264

## 18 19 265 **FUNDING**

20  
21  
22 266 The clinical registry data used in this publication are from the CCN and its  
23  
24 267 member hospitals. The CCN is dedicated to improving the quality, efficiency, access and  
25  
26  
27 268 equity of adult cardiovascular services in Ontario, Canada. The CCN is funded by the  
28  
29 269 MOHLTC. This study was funded in part by operating funds from Canadian Institute of  
30  
31 270 Health Research (CIHR), Schulich Heart Center and the Sunnybrook Research Institute.  
32  
33  
34 271 This study was supported by the Institute for Clinical Evaluative Sciences (ICES), which  
35  
36 272 is funded by an annual grant from the MOHLTC. The opinions, results and conclusions  
37  
38 273 reported in this paper are those of the authors and are independent from the funding  
39  
40 274 sources. No endorsement by ICES or the MOHLTC is intended or should be inferred.  
41  
42  
43 275 Parts of this material are based on data and information compiled and provided by CIHI.  
44  
45 276 However, the analyses, conclusions, opinions and statements expressed herein are those  
46  
47 277 of the author, and not necessarily those of CIHI. Dr H. Wijeysondera is supported by a  
48  
49 278 Distinguished Clinical Scientist Award from the Heart and Stroke Foundation of Canada.  
50  
51 279 Dr. Ko is supported by a Clinician Scientist Phase II personnel award from the Heart and  
52  
53 280 Stroke Foundation, Ontario Provincial Office. Dr. Austin is supported in part by a Career  
54  
55  
56  
57  
58  
59  
60

1  
2  
3  
4  
5  
6  
7  
8  
9  
10  
11  
12  
13  
14  
15  
16  
17  
18  
19  
20  
21  
22  
23  
24  
25  
26  
27  
28  
29  
30  
31  
32  
33  
34  
35  
36  
37  
38  
39  
40  
41  
42  
43  
44  
45  
46  
47  
48  
49  
50  
51  
52  
53  
54  
55  
56  
57  
58  
59  
60

281 Investigator Award from the Heart and Stroke Foundation. Dr. Wijeyesundera had full  
282 access to all of the data in the study and takes responsibility for the integrity of the data  
283 and accuracy of the data analysis.

284

285 **CONFLICTS**

286 The authors do not have any potential conflicts of interest or industry relationships to  
287 disclose.

288

Confidential

289 **References**

- 290 1. Thériault L, Stonebridge C, Browarski S, Conference Board of Canada, Canadian  
291 Heart Health Strategy and Action Plan, Heart and Stroke Foundation of Canada,  
292 et al. The Canadian heart health strategy: risk factors and future cost implications.  
293 Conference Board of Canada; 2010.
- 294 2. Public Health Agency of Canada. Economic Burden of Illness in Canada, 2005-2008.  
295 Ottawa: Her Majesty the Queen in Right of Canada; 2014. Report No.: 130148.
- 296 3. Tarride JE, Lim M, DesMeules M, Luo W, Burke N, O'Reilly D, et al. A review  
297 of the cost of cardiovascular disease. *Canadian Journal of Cardiology*.  
298 2009;25(6):e195–202.
- 299 4. Simoons ML, Windecker S. Controversies in cardiovascular medicine: chronic  
300 stable coronary artery disease: drugs vs. revascularization. *European Heart*  
301 *Journal*. 2010;31(5):530-41.
- 302 5. Boden WE, O'Rourke RA, Teo KK, Maron DJ, Hartigan PM, Sedlis SP, et al.  
303 Impact of optimal medical therapy with or without percutaneous coronary  
304 intervention on long-term cardiovascular end points in patients with stable  
305 coronary artery disease (from the COURAGE Trial). *American Journal of*  
306 *Cardiology*. 2009;104(1): 1-4.
- 307 6. Bari D. Study Group. A randomized trial of therapies for type 2 diabetes and  
308 coronary artery disease. *New England Journal of Medicine*. 2009;360(24): 2503-  
309 15.
- 310 7. Bennell MC, Qiu F, Austin PC, Wijeyesundera HC. Determinants of variations in  
311 initial treatment strategies for stable ischemic heart disease. *Canadian Medical*  
312 *Association Journal*. 2015;187(10):e317-25.

1  
2  
3  
4  
5  
6  
7  
8  
9  
10  
11  
12  
13  
14  
15  
16  
17  
18  
19  
20  
21  
22  
23  
24  
25  
26  
27  
28  
29  
30  
31  
32  
33  
34  
35  
36  
37  
38  
39  
40  
41  
42  
43  
44  
45  
46  
47  
48  
49  
50  
51  
52  
53  
54  
55  
56  
57  
58  
59  
60

- 313 8. Anderson J, Heidenreich PA, Barnett PG; Creager MA, Fonarow GC, Gibbons,  
314 RJ, et al. ACC/AHA statement on cost/value methodology in clinical practice  
315 guidelines and performance measures. *Journal of the American College of*  
316 *Cardiology*. 2014;63(21):2304-2322.
- 317 9. Cardiac Care Network of Ontario [Internet]. Toronto: Cardiac Care Network of  
318 Ontario [updated 2011; cited 2015 Dec 1]. Available from:  
319 [http://www.ccn.on.ca/ccn\\_public/FormsHome/HomePage.aspx](http://www.ccn.on.ca/ccn_public/FormsHome/HomePage.aspx)
- 320 10. Cardiac Care Network of Ontario. Cardiac Care Network Annual Report 2001-  
321 2012. Toronto: Cardiac Care Network of Ontario; 2012.
- 322 11. Ko DT, Guo H, Wijeyesundera HC, Natarajan MK, Naqpal AD, Feindel CM, et al.  
323 Assessing the association of appropriateness of coronary revascularization and  
324 clinical outcomes for patients with stable coronary artery disease. *Journal of the*  
325 *American College of Cardiology*. 2012;60(19):1876-84.
- 326 12. Schwalm, JR, Wijeyesundera, HC, Tu, JV, Guo H, Kingsbury KJ, Natarajan MK.  
327 Influence of coronary anatomy and SYNTAX Score on the variations in  
328 revascularization strategies for patients with multivessel disease. *Canadian*  
329 *Journal of Cardiology*. 2014;30(10):1153-4.
- 330 13. Tu JV, Ko DT, Guo H, Richards JA, Walton N, Natarajan MK, et al.  
331 Determinants of variations in coronary revascularization practices. *Canadian*  
332 *Medical Association Journal*. 2012;184(2):179-86.
- 333 14. Gurevich Y, McFarlane A, Morris K, Jokovic A, Peterson GM, Webster GK.  
334 Estimating the number of coronary artery bypass graft and percutaneous coronary  
335 intervention procedures in Canada: A comparison of cardiac registry and



- 1  
2  
3 336 Canadian Institute for Health Information data sources. Canadian Journal of  
4  
5 337 Cardiology. 2010;26(7): e249-53.  
6  
7  
8 338 15. Wijeyesundera HC, Wang X, Tomlinson G, Ko DT, Krahn MD. Techniques for  
9  
10 339 estimating health care costs with censored data: an overview for the health  
11  
12 340 services researcher. ClinicoEconomics Outcomes and Research. 2012;4:145–155.  
13  
14  
15 341 16. Jacobs P, Yim R. Using Canadian administrative databases to derive economic  
16  
17 342 data for health technology assessments. Ottawa: Canadian Agency for Drugs and  
18  
19 343 Technologies in Health; 2009.  
20  
21  
22 344 17. Austin PC, Ghali WA, Tu JV. A Comparison of Several Regression Models for  
23  
24 345 Analysing Costs of CABG Surgery. Statistics in Medicine. 2003;22(17):2799-  
25  
26 346 2815.  
27  
28  
29 347 18. Stewart S, Murphy NF, Walker A, McGuire A, McMurray JJ. The current cost of  
30  
31 348 angina pectoris to the National Health Service in the UK. Heart. 2003;89(8):848–  
32  
33 349 53.  
34  
35  
36 350 19. Liu JLY, Maniadakis N, Gray A, Rayner M. The economic burden of coronary  
37  
38 351 heart disease in the UK. Heart. 2002;88(6):597–603.  
39  
40  
41 352 20. Leal J, Luengo-Fernández R, Gray A, Petersen S, Rayner M. Economic burden of  
42  
43 353 cardiovascular diseases in the enlarged European Union. European Heart Journal.  
44  
45 354 2006;27(13):1610–9.  
46  
47  
48 355 21. Wijeyesundera HC, Bennell MC, Qiu F, Ko DT, Tu JV, Wijeyesundera DN, et al.  
49  
50 356 Comparative-effectiveness of revascularization versus routine medical therapy for  
51  
52 357 stable ischemic heart disease: a population-based study. Journal of General  
53  
54 358 Internal Medicine. 2014;29(7):1031-9.  
55  
56  
57  
58  
59  
60

1  
2  
3  
4  
5  
6  
7  
8  
9  
10  
11  
12  
13  
14  
15  
16  
17  
18  
19  
20  
21  
22  
23  
24  
25  
26  
27  
28  
29  
30  
31  
32  
33  
34  
35  
36  
37  
38  
39  
40  
41  
42  
43  
44  
45  
46  
47  
48  
49  
50  
51  
52  
53  
54  
55  
56  
57  
58  
59  
60

359 FIGURE LEGENDS

360 Figure 1. Study population

361 Figure 2. Variation in individual and hospital level costs

Confidential

**Table 2. Components of 1-year mean costs**

| <b>Cost category</b>       | <b>Total cost</b> | <b>Medical</b> | <b>Revascularization</b> | <b>p-value</b> |
|----------------------------|-------------------|----------------|--------------------------|----------------|
| Acute care hospitalization | \$11,373          | \$7,038        | \$14,109                 | <0.001         |
| ER                         | \$372             | \$367          | \$375                    | 0.262          |
| Surgery                    | \$2,691           | \$2,090        | \$3,071                  | <0.001         |
| Physician visits           | \$5,449           | \$4,079        | \$6,313                  | <0.001         |
| Medication*                | \$1,810           | \$1,857        | \$1,780                  | 0.004          |
| Laboratory                 | \$194             | \$195          | \$193                    | 0.326          |
| Long term care             | \$54              | \$93           | \$29                     | <0.001         |

ER = emergency room

\* For patients over 65 years of age

Confidential

1  
2  
3  
4  
5  
6  
7  
8  
9  
10  
11  
12  
13  
14  
15  
16  
17  
18  
19  
20  
21  
22  
23  
24  
25  
26  
27  
28  
29  
30  
31  
32  
33  
34  
35  
36  
37  
38  
39  
40  
41  
42  
43  
44  
45  
46  
47  
48  
49  
50  
51  
52  
53  
54  
55  
56  
57  
58  
59  
60

| <b>CABG</b> | <b>PCI</b> | <b>p-value</b> |
|-------------|------------|----------------|
| \$25,927    | \$7,755    | <0.001         |
| \$403       | \$361      | <0.001         |
| \$1,901     | \$3,699    | <0.001         |
| \$10,086    | \$4,284    | <0.001         |
| \$1,476     | \$1,944    | <0.001         |
| \$217       | \$180      | <0.001         |
| \$47        | \$19       | <0.001         |

Confidential

**Table 3. Predictors of 1-year cumulative health care costs**

| <b>Covariates</b>                       | <b>RR (95% CI)</b> | <b>p-value</b> |
|-----------------------------------------|--------------------|----------------|
| <b>Treatment</b>                        |                    |                |
| Medical management                      | referent           |                |
| PCI                                     | 1.27 (1.24-1.31)   | <0.001         |
| CABG                                    | 2.62 (2.53-2.71)   | <0.001         |
| <b>Hospital revascularization ratio</b> |                    |                |
| Low                                     | referent           |                |
| Medium                                  | 1.03 (0.93-1.15)   | 0.560          |
| High                                    | 1.08 (0.97-1.21)   | 0.130          |
| <b>Patient-level factors</b>            |                    |                |
| <b>Demographics</b>                     |                    |                |
| Age, yrs                                | 1.01 (1.01-1.01)   | <0.001         |
| Male gender                             | 0.96 (0.95-0.98)   | <0.001         |
| Rural                                   | 0.97 (0.95-0.99)   | <0.001         |
| Income*                                 |                    |                |
| 5                                       | referent           |                |
| 1                                       | 1.10 (1.07-1.12)   | <0.001         |
| 2                                       | 1.04 (1.02-1.07)   | <0.001         |
| 3                                       | 1.02 (1.00-1.05)   | 0.072          |
| 4                                       | 1.02 (1.00-1.05)   | 0.036          |
| <b>Medical comorbidities</b>            |                    |                |
| PVD                                     | 1.25 (1.21-1.28)   | <0.001         |
| Previous MI                             | 0.95 (0.93-0.97)   | <0.001         |
| COPD                                    | 1.10 (1.07-1.13)   | <0.001         |
| Charlson score                          | 1.17 (1.16-1.17)   | <0.001         |
| <b>Cardiac risk factors</b>             |                    |                |
| Diabetes                                | 1.00 (0.99-1.02)   | 0.640          |
| Hypertension                            | 1.11 (1.08-1.13)   | <0.001         |
| Hyperlipidemia                          | 0.95 (0.93-0.97)   | <0.001         |
| History smoking                         | 1.00 (0.99-1.02)   | 0.930          |
| <b>Cardiac status/testing</b>           |                    |                |
| Native stenosis <sup>†</sup>            |                    |                |
| LM                                      | 1.12 (1.09-1.15)   | <0.001         |
| Prox LAD                                | 1.10 (1.08-1.11)   | <0.001         |
| Mid/distal LAD                          | 1.08 (1.06-1.09)   | <0.001         |
| Circumflex                              | 1.11 (1.09-1.12)   | <0.001         |
| RCA                                     | 1.09 (1.07-1.11)   | <0.001         |
| Previous CABG                           | 0.83 (0.82-0.85)   | <0.001         |
| LV function                             |                    |                |

|    |                                |                  |        |
|----|--------------------------------|------------------|--------|
| 1  |                                |                  |        |
| 2  |                                |                  |        |
| 3  |                                |                  |        |
| 4  | ≥50%                           | referent         |        |
| 5  | 35-49%                         | 1.03 (1.00-1.05) | 0.020  |
| 6  | ≤34%                           | 1.14 (1.10-1.18) | <0.001 |
| 7  | NA                             | 0.95 (0.93-0.97) | <0.001 |
| 8  |                                |                  |        |
| 9  | <b>Exercise ECG risk</b>       |                  |        |
| 10 | Low risk                       | referent         |        |
| 11 | High risk                      | 1.04 (1.02-1.06) | 0.003  |
| 12 | Uninterpretable                | 1.09 (1.05-1.14) | <0.001 |
| 13 | NA                             | 1.24 (1.21-1.27) | <0.001 |
| 14 |                                |                  |        |
| 15 | <b>Functional imaging risk</b> |                  |        |
| 16 | Low risk                       | referent         |        |
| 17 | High risk                      | 1.01 (0.99-1.03) | 0.280  |
| 18 | Unknown/NA                     | 1.05 (1.03-1.08) | <0.001 |
| 19 |                                |                  |        |
| 20 |                                |                  |        |
| 21 | <b>CCS class</b>               |                  |        |
| 22 | 0                              | referent         |        |
| 23 | 1                              | 0.90 (0.87-0.92) | <0.001 |
| 24 | 2                              | 0.88 (0.85-0.90) | <0.001 |
| 25 | 3                              | 0.90 (0.88-0.92) | <0.001 |
| 26 | 4                              | 0.86 (0.82-0.90) | <0.001 |
| 27 |                                |                  |        |
| 28 |                                |                  |        |
| 29 | <b>Physician factors</b>       |                  |        |
| 30 | <b>Referral physician</b>      |                  |        |
| 31 | Family physician               | referent         |        |
| 32 | Cardiology                     | 1.02 (1.01-1.05) | 0.005  |
| 33 | Internal medicine              | 1.00 (0.98-1.03) | 0.680  |
| 34 | Other                          | 1.22 (1.19-1.27) | <0.001 |
| 35 | Missing                        | 1.03 (1.00-1.05) | 0.023  |
| 36 |                                |                  |        |
| 37 |                                |                  |        |
| 38 | <b>Hospital factors</b>        |                  |        |
| 39 | Annual cath volume             | 0.99 (0.99-0.99) | <0.001 |

CABG= coronary artery bypass grafting, Cath = catheterization, CI = confidence interval,

COPD = chronic obstructive pulmonary disease, ECG = electrocardiogram,

LAD = left anterior descending, LM = left main, LV = left ventricular, MI = myocardial infarction,

NA implies not done or missing, PCI = percutaneous coronary intervention,

PVD = peripheral vascular disease, RCA = right coronary artery, RR= rate ratio.

\* Income quintile: 1=lowest, 5 = highest.

†LM if ≥50% stenosis, Prox LAD if ≥70% stenosis, Mid/distal LAD if ≥70% stenosis,

Circumflex if ≥70% stenosis, RCA if ≥70% stenosis.

Figure 2. Variation in individual and hospital level costs

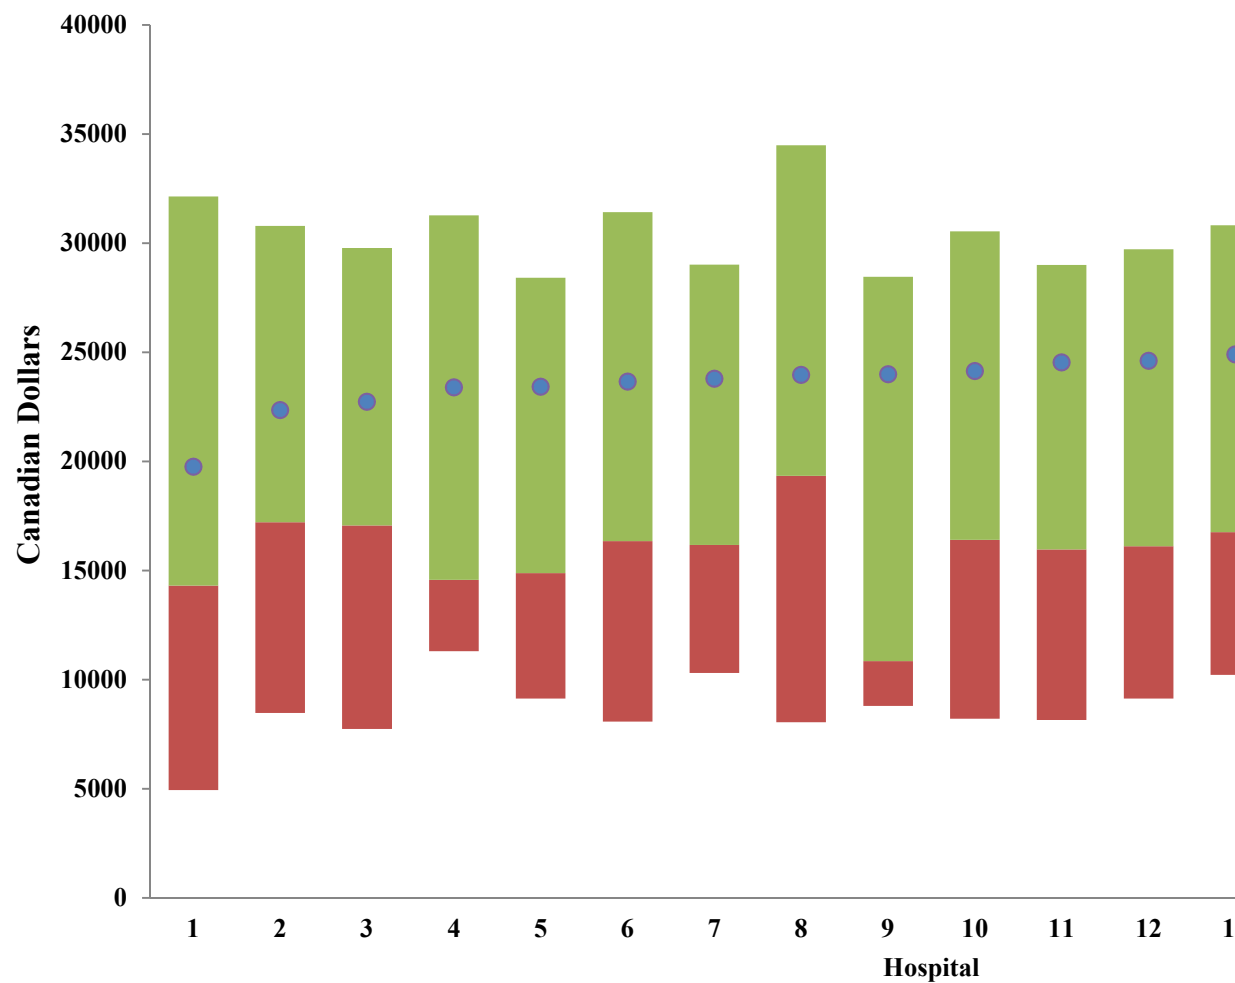

1  
2  
3  
4  
5  
6  
7  
8  
9  
10  
11  
12  
13  
14  
15  
16  
17  
18  
19  
20  
21  
22  
23  
24  
25  
26  
27  
28  
29  
30  
31  
32  
33  
34  
35  
36  
37  
38  
39  
40  
41  
42  
43  
44  
45  
46  
47  
48  
49  
50  
51  
52  
53  
54  
55  
56  
57  
58  
59  
60

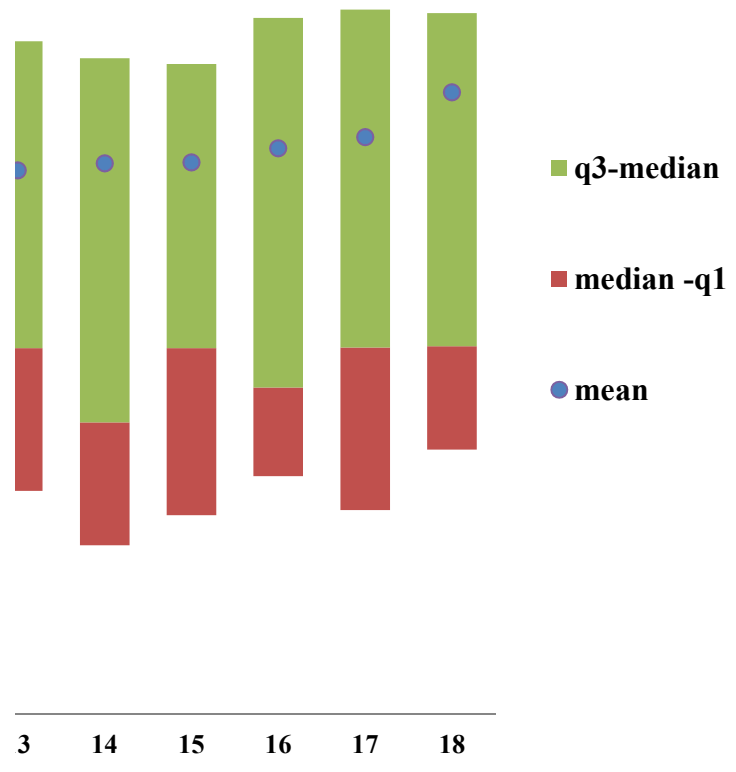

ntial



Appendix table 1. Predictors of 1-year cumulative health care costs\*

| Covariates                 | RR (95% CI)      | p-value |
|----------------------------|------------------|---------|
| <b>Treatment:</b>          |                  |         |
| <b>Medical management:</b> |                  |         |
| High vs. low               | 1.08 (0.98-1.20) | 0.127   |
| Medium vs. low             | 1.03 (0.93-1.13) | 0.562   |
| High vs. medium            | 1.05 (0.95-1.16) | 0.318   |
| <b>PCI:</b>                |                  |         |
| High vs. low treatment     | 1.04 (0.94-1.15) | 0.415   |
| Medium vs. low treatment   | 1.06 (0.96-1.17) | 0.237   |
| High vs. medium treatment  | 0.98 (0.89-1.08) | 0.719   |
| <b>CABG:</b>               |                  |         |
| High vs. low               | 1.00 (0.90-1.10) | 0.964   |
| Medium vs. low             | 1.00 (0.91-1.11) | 0.929   |
| High vs. medium            | 0.99 (0.90-1.10) | 0.893   |

CABG = coronary artery bypass graft, CI = confidence interval,  
 PCI = percutaneous coronary intervention, RR= rate ratio.

\*Fully adjusted model for patient characteristics

1  
2  
3  
4  
5  
6  
7  
8  
9  
10  
11  
12  
13  
14  
15  
16  
17  
18  
19  
20  
21  
22  
23  
24  
25  
26  
27  
28  
29  
30  
31  
32  
33  
34  
35  
36  
37  
38  
39  
40  
41  
42  
43  
44  
45  
46  
47  
48  
49  
50  
51  
52  
53  
54  
55  
56  
57  
58  
59  
60

Appendix figure 1. Variation in initial treatment strategy across Ontario

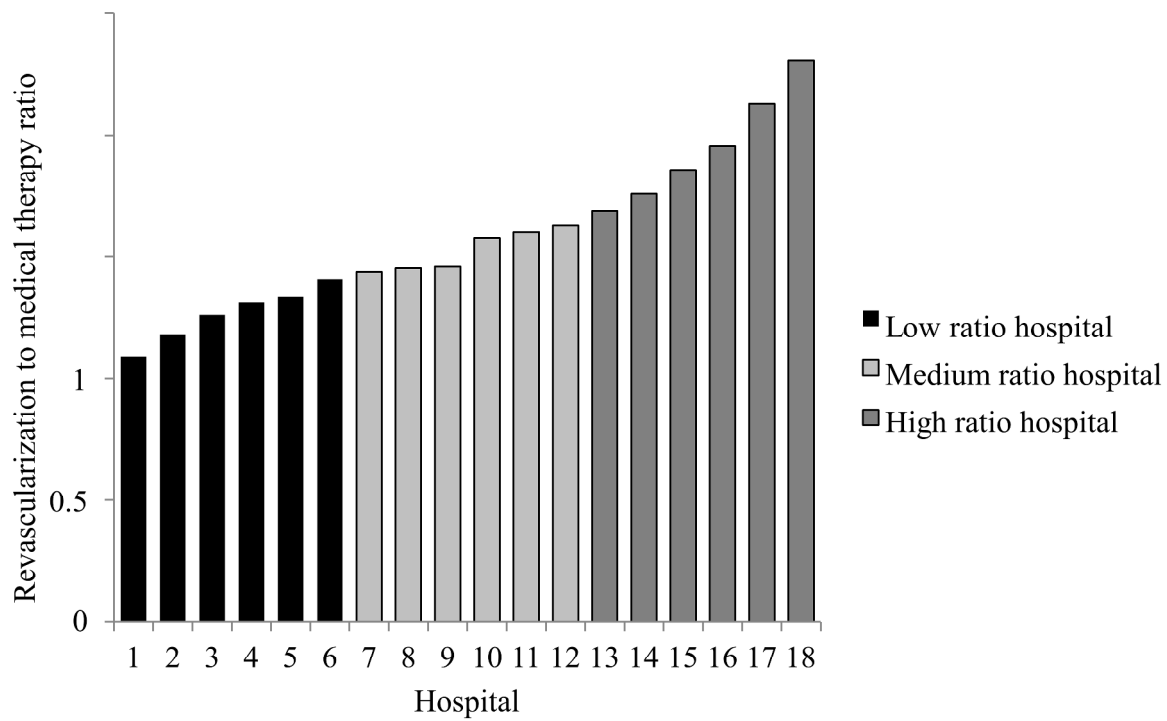

Confidential
